# Supplementary material
Source: publisher figshare collection journal article supplement (https://karger.figshare.com/ndownloader/files/18057395)
Supplement: Supplementary file 1 [file 18057395]

## Supplementary Material

### Dimethylarginine Dimethyl Aminohydrolase-1 polymorphisms and venous intimal hyperplasia in dialysis patients

Wu C.C., Hsieh M.Y., Lee C.K., Chuang S.Y., Chung M.Y., Lin C.C.

**Supplemental Table 2** Distribution of lesion locations stratified by types of vascular access

| Variables             | Total cohort | No early restenosis | Early restenosis | P Value |
|-----------------------|--------------|---------------------|------------------|---------|
| <b>Graft</b>          | 190          | 99                  | 91               |         |
| Graft-vein junction   | 83 (44%)     | 46 (47%)            | 37 (41%)         | 0.47    |
| Graft-artery junction | 10 (5%)      | 6 (6%)              | 4 (4%)           | 0.75    |
| Intra-graft           | 33 (17%)     | 14 (14%)            | 19 (21%)         | 0.25    |
| Cephalic vein         | 30 (16%)     | 16 (16%)            | 14 (15%)         | 0.99    |
| Basilic vein          | 60 (32%)     | 25 (26%)            | 35 (39%)         | 0.08    |
| Others                | 4 (2%)       | 2 (2%)              | 2 (2%)           | 0.99    |
| <b>Fistula</b>        | 283          | 201                 | 82               |         |
| Proximal vein         | 158 (56%)    | 125 (62%)           | 33 (40%)         | <0.01   |
| Cephalic vein         | 76 (27%)     | 46 (23%)            | 30 (37%)         | 0.03    |
| Basilic vein          | 41 (15%)     | 25 (13%)            | 16 (20%)         | 0.19    |
| Others                | 12 (4%)      | 9 (4%)              | 3 (4%)           | 0.76    |

Data are expressed as N (%); some vessels had more than one lesion treated.
